# Supplementary material for: Hyperglycemia in severe traumatic brain injury patients and its association with thirty-day mortality: a prospective observational cohort study in Uganda
Source: PeerJ journal article supplement (doi:10.7717/peerj.10589), 2021-01-15
Supplement: Questionnare.pdf [file Questionnare.pdf]

## APPENDIX IV: QUESTIONNAIRE

Hyperglycemia in severe Traumatic Brain Injury and its association with thirty-day mortality in  
Mulago National Referral Hospital (MNRH), Uganda

**Fill in the available spaces or tick appropriately**

|                                                |            |                           |                        |           |
|------------------------------------------------|------------|---------------------------|------------------------|-----------|
| Code NO.                                       |            | Date                      |                        |           |
| 1. Age :.....( in yrs.)                        |            | 2.                        | Sex:<br>a)Male         | b) Female |
| 3. Address:.....                               |            | 4.                        | Occupation ( specify): |           |
| Phone No.1                                     | Phone No.3 | .....                     |                        |           |
| Phone No.2                                     |            |                           |                        |           |
| <b>5.Marital status</b>                        |            | <b>6. Cause of TBI</b>    |                        |           |
| a)Single                                       |            | a) RTA                    |                        |           |
| b)Married                                      |            | b) Falls                  |                        |           |
| c)Widowed                                      |            | c) Assault                |                        |           |
| d)Divorced                                     |            | d) Domestic violence      |                        |           |
|                                                |            | e) Work related           |                        |           |
|                                                |            |                           |                        |           |
| <b>7. Who brought the patient to Hospital?</b> |            | <b>8. Mode of arrival</b> |                        |           |

|                                                       |  |                                   |                   |
|-------------------------------------------------------|--|-----------------------------------|-------------------|
| a) Police                                             |  | a) Ambulance                      | b) Police Pick-up |
| b) Nurse from referral site                           |  | c) Private vehicle                | d) Public vehicle |
| c) Well-wishers                                       |  | e) Motorcycle                     | f) Bicycle        |
| d) Attendants                                         |  | g) Other(Specify)                 |                   |
| e) Other(Specify)                                     |  |                                   |                   |
|                                                       |  |                                   |                   |
| <b>9. Time between injury and arrival to Hospital</b> |  | <b>10. Pre-hospital treatment</b> |                   |
|                                                       |  | a. Oxygen                         | b. IV fluids      |

|                               |                        |                          |                          |
|-------------------------------|------------------------|--------------------------|--------------------------|
| a. <1hr                       | b. 1-6hrs              | c. Mannitol              | d. Antibiotics           |
| c. 6- 12hrs                   | d. 12-24hr             | e. Analgesia             | f. Intubation            |
| e. 24-48hrs                   | f. >48hrs              | g. Steroids              | h. Glucose               |
| <b>11.Long term illness</b>   |                        |                          |                          |
| a. Diabetes Mellitus          | b. Hypertension        | c. Chronic Renal Disease | d. Chronic disease liver |
| e. Others                     |                        |                          |                          |
| <b>12. Chronic medication</b> |                        |                          |                          |
| a. Steroid therapy            | b. Hypoglycemia agents | c. Antihypertensive      | d. others                |
| <b>13.Substance abuse</b>     |                        |                          |                          |
| a. Alcohol                    | b. Cigarette smoking   | c. Cocaine               | d. Others                |

i. Other (specify).....

|                                                                                        |              |                                         |                        |
|----------------------------------------------------------------------------------------|--------------|-----------------------------------------|------------------------|
| <b>11.Vomiting:Yes          No</b>                                                     |              | <b>12. Convulsions: Yes          No</b> |                        |
| <b>13.Post-resuscitation GCS</b>                                                       |              | <b>14. Pupillary response and size</b>  |                        |
|                                                                                        | <b>Total</b> |                                         |                        |
| a. Eye opening                                                                         |              |                                         | a. Normal              |
| a. Verbal Response<br>b. Motor response                                                |              |                                         | b. Dilated right pupil |
| Systolic BP (mmHg) <90                                                                 | >90          |                                         |                        |
| Pulse Rate/min                                                                         |              |                                         | c. Dilated left pupil  |
| Respiratory Rate /min<br>Temperature (°C)<br>Oxygen saturation(SpO <sub>2</sub> ) <90% | >90%         |                                         |                        |

|                                                          |  |                                                                                                |
|----------------------------------------------------------|--|------------------------------------------------------------------------------------------------|
| <b>15.RBSmmol/L</b><br>a. At Admission<br>b. After 24hrs |  | <b>16. HBA1c</b>                                                                               |
| <b>17. CSF Leak</b>                                      |  | <b>18. Limb weakness</b>                                                                       |
| a)Nose Both R/L                                          |  | a)Upper limbs RL                                                                               |
| b)Ear Both R/L                                           |  | b)Lower limbs RL                                                                               |
| <b>19.Peri-orbital ecchymosis</b> Yes No                 |  | <b>22. Fractures</b> (Specify the site)                                                        |
| <b>20.Abdominal injury</b> (specify)                     |  | <b>23. Facial fracture</b>                                                                     |
| <b>21.Chest injury</b> (specify)                         |  | <b>24. Neck stiffness</b> Yes No                                                               |
| <b>25.Laboratory parameters</b>                          |  | <b>26. Time between admission and surgery</b>                                                  |
| a. Hemoglobin (Hb)                                       |  | a) <6hrs                                                                                       |
| b. Serum sodium                                          |  | b) 6-24hrs                                                                                     |
| c. Serum potassium                                       |  | c) 24-48hrs                                                                                    |
| <b>27.Cause of delay</b>                                 |  | <b>28. Findings at surgery</b>                                                                 |
| a) Lack of supplies<br><br>b) Lack of theatre space      |  | a) Subdural hematoma<br>b)Epidural hematoma<br>c) Brain edema<br>d) Contusion<br>e) Laceration |
| c) Later development of features of raised ICP           |  | f) Other(Specify                                                                               |

|                                                                                                                                                                                          |                                                                                                                                                                                          |
|------------------------------------------------------------------------------------------------------------------------------------------------------------------------------------------|------------------------------------------------------------------------------------------------------------------------------------------------------------------------------------------|
|                                                                                                                                                                                          |                                                                                                                                                                                          |
| <p><b>29. Surgery done</b></p> <p>a) Decompressive craniectomy</p> <p>b) Osteoplastic decompressive craniotomy</p> <p>c) Duroplasty</p>                                                  | <p><b>30. Other surgical intervention</b></p> <p>i) Tracheostomy</p> <p>ii) Thoracostomy</p> <p>iii) Laparotomy</p> <p>iv) Fracture management</p> <p>v) Other (Specify)</p>             |
| <p><b>31. ICU</b></p> <p>Number of days on ventilation</p> <p>GCS at discharge from ICU</p> <p>a. Motor response</p> <p>b. Eye opening</p> <p>c. Verbal response</p> <p>Death in ICU</p> | <p><b>32. Laboratory parameters in ICU</b></p> <p>a. Hemoglobin (Hb)</p> <p>b. Glucose (mmol/L)</p> <p>c. Serum sodium</p> <p>d. Serum potassium</p> <p>e. Urea</p> <p>f. Creatinine</p> |
| <p><b>33. Emergency/Ward 1</b></p> <p>a. Wound infection</p> <p>b. Extradural CSF leak</p> <p>c. Meningitis</p> <p>d. Swelling at the operation site</p> <p>e. Abscess</p>               | <p><b>34. status at 30 days</b></p> <p>a. Alive</p> <p>b. Dead</p>                                                                                                                       |

### APPENDIX III: GLASGOW COMA SCALE

| Parameter       | Response                            | Score |
|-----------------|-------------------------------------|-------|
| Eye opening     | None                                | 1     |
|                 | To pain                             | 2     |
|                 | To speech                           | 3     |
|                 | spontaneously                       | 4     |
| Verbal Response | None                                | 1     |
|                 | Incomprehensible sounds             | 2     |
|                 | Inappropriate words                 | 3     |
|                 | Confused                            | 4     |
|                 | Well Oriented                       | 5     |
| Motor Response  | None                                | 1     |
|                 | Abnormal extension                  | 2     |
|                 | Abnormal Flexion                    | 3     |
|                 | Withdraws from pain(normal flexion) | 4     |
|                 | Localizes pain                      | 5     |
|                 | Obeys commands                      | 6     |
